# Supplementary material
Source: MDPI journal article supplement (https://www.mdpi.com/2071-1050/13/2/898)
Supplement: s1 [file s1]

## Sheet: Overview
Electronic Supplementary Materials
Combining life cycle assessment and circularity assessment to analyze the environmental impacts of the medical remanufacturing of electrophysiology catheters
Content
No.	Sheet	Description
1	BoM__sepcification_catheter	Bill of materials and product sepcification of a virgin manufactured catheter
2	LCI	Life cycle inventory of the medical remanufacturing and virgin production route
3	LCIA_GWI	Results of the life cycle impact assessment for the global warming impact of the medical remanufacturing and virgin production route
4	LCIA_esource_use	Results of the life cycle impact assessment for the abiotic resource use of the medical remanufacturing and virgin production route
5	Sensitivity_analysis	Results of the sensitivity analysis of the collection rate

## Sheet: BoM_specification_catheter
Materials	Unit	Value	[%]	Construction part
Catheter (total)		118.9	1
Polyetherimide (PEI) per catheter	[g]	108.1	0.909167	Plug (17.3 g) and Handle (90.8 g)
Polyethylene, low density (PE-LD) per catheter	[g]	0.3	0.00252313	Shaft stiffener
Polyethylene Block Amide (PEBA), e.g. PEBAX® per catheter	[g]	8.9	0.0748528	Shaft
Polyurethane (PUR), filled with Bariumsuphate (BaSO4) per catheter	[g]	0.8	0.00672834	Curvature and Loop
Polyether ether ketone (PEEK) per catheter	[g]	0.0075	6.30782e-05	Shaft sleeve
Name of the product	Cuvature type	Lasso diameter max	Lasso diameter min	Effective length	Diameter shaft/curvature	Diameter loop shaft
Characteristics of the variable loop diagnotistic catheter NAV eco BWO	D	25 mm	15 mm	115 cm	7F / 7F	4F

## Sheet: LCI
Medical remanufacturing route
Inputs
Flow	Category	Value	Unit	Provider	Note
BTX-Fraction	Product flows/Materials production/Organic chemicals	0.00396	kg	DE: Aromatics (BTX) at refinery ts
Carbon dioxide	Product flows/Materials production/Inorganic chemicals	0.00282	kg	DE: Ammonia (NH3) synthesis with CO2 recovery, by-product carbon dioxide (without allocation) ts <p-agg>
Citric acid	Product flows/Materials production/Inorganic chemicals	0.0088	kg	US: Citric acid (from starch) ts	No German provider in the database available
Corrugated board	Product flows/Materials production/Food and renewable raw materials	0.14	kg	EU-28: Corrugated board excl. paper production (2018), open paper input, average composition ts/FEFCO <p-agg>	The corrugated board production was modelled inlc. paper production (for 0.14 kg corrugated board an input of 0.154 paper is needed --> see process "corrugated board input" below)
Electricity; consumption mix, at consumer; AC	Product flows/Energy carriers and technologies/Electricity	0.515357	kWh	DE: Electricity grid mix ts
Ethylene oxide	Product flows/Materials production/Organic chemicals	0.00018	kg	DE: Ethylene oxide (EO) via air ts
Hydrogen peroxide (100%)	Product flows/Materials production/Inorganic chemicals	0.01511	kg	DE: Hydrogen peroxide (100%; H2O2) (Hydrogen from steam reforming) ts
Polyethylene high density granulate (HDPE/PE-HD)	Product flows/Materials production/Plastics	0.02	kg	DE: Polyethylene High Density Granulate (HDPE/PE-HD) ts
Soda (sodium carbonate)	Product flows/Materials production/Inorganic chemicals	0.00577	kg	DE: Soda (Na2CO3) ts
Sodium cumene sulphonate (40%)	Product flows/Materials production/Organic chemicals	0.00035	kg	EU-28: Sodium cumene sulphonate (No. 30 - Matrix) ERASM
Transporting capacity	Product flows/Materials production/Other materials	18.3449	kgkm	EU-28: Transport, van (up to 7,5 t total cap., 3.3t payload) (A4) ts
Water (desalinated; deionised)	Product flows/Materials production/Other materials	5.002	kg	DE: Water (desalinated; deionised) ts
Water (tap water); production mix, at plant; water purification treatment	Product flows/Materials production/Other materials	7	kg	DE: Tap water from groundwater ts
Outputs
Catheter		1	Item(s)
Incineration good	Waste flows/Wastes	0.109	kg	DE: Plastic packaging in waste incineration plant ts <p-agg>
Virgin production route
Inputs
Flow	Category	Value	Unit	Provider
Carbon dioxide	Product flows/Materials production/Inorganic chemicals	0.00282	kg	US: Ammonia (NH3) synthesis with CO2 recovery, by-product carbon dioxide (without allocation) ts <p-agg>
Corrugated board	Product flows/Materials production/Food and renewable raw materials	0.14	kg	EU-28: Corrugated board excl. paper production (2018), open paper input, average composition ts/FEFCO <p-agg>	The corrugated board production was modelled inlc. paper production (for 0.14 kg corrugated board an input of 0.154 paper is needed --> see process "corrugated board input" below)
Ethylene oxide	Product flows/Materials production/Organic chemicals	0.00018	kg	US: Ethylene oxide (EO) via air ts
Polyamide 6 fibres (PA 6)	Product flows/Materials production/Plastics	0.00320312	kg	US: Polyamide 6 Granulate (PA 6) ts
Polyetherimide granulate (PEI)	Materials production/Plastics	0.1081	kg	DE: Polyetherimide granulate (PEI) ts	No US provider in the database available
Polyethylene glycol (PEG)	Materials production/Plastics	0.00124688	kg	DE: Polyethylene glycol (PEG) ts	No US provider in the database available
Polyethylene high density granulate (HDPE/PE-HD)	Product flows/Materials production/Plastics	0.02	kg	US: Polyethylene High Density Granulate (HDPE/PE-HD) ts
Polyethylene low density granulate (LDPE/PE-LD)	Product flows/Materials production/Plastics	0.0003	kg	US: Polyethylene Low Density Granulate (LDPE/PE-LD) ts
Polyurethane flexible foam (PU) - TDI-based, no flame retardant, low density	Product flows/Materials production/Plastics	0.0008	kg	EU-28: Polyurethane flexible foam (PU) - TDI-based, no flame retardant, low density EUROPUR	No US provider in the database available
Transporting capacity	Product flows/Materials production/Other materials	18.34	kgkm	EU-28: Transport, van (up to 7,5 t total cap., 3.3t payload) (A4) ts	The transport to the hospital takes place in Germany
Transporting capacity	Product flows/Materials production/Other materials	2725.16	kgkm	GLO: Transoceanic ship, containers, 27,500 dwt payload capacity, ocean going ts
Water (desalinated; deionised)	Product flows/Materials production/Other materials	0.002	kg	US: Water deionized ts
Electricity; consumption mix, at consumer; AC	Product flows/Energy carriers and technologies/Electricity	0.3633	kWh	US: Electricity grid mix ts
Outputs
Catheter		1	Item(s)
Incineration good	Waste flows/Wastes	0.1189	kg	DE: Plastic packaging in waste incineration plant ts <p-agg>	The waste incineration is assumed to take placed in Germany because the catheters are used and disposed in Germany
Corrugated borad input (paper production needed as input in corrugated board production)
Inputs
Flow	Category	Value	Unit	Provider
Testliner		0.0693	kg	EU-28: Testliner (2018) - for use in cut-off EoL scenario cases ts/FEFCO <p-agg>
Kraftliner		0.0216	kg	EU-28: Kraftliner (2018) - for use in cut-off EoL scenario cases ts/FEFCO <p-agg>
Semichemical Fluting		0.00616	kg	EU-28: Semichemical Fluting (2018) - for use in cut-off EoL scenario cases ts/FEFCO <p-agg>
Wellenstoff / Fluting		0.057	kg	EU-28: Wellenstoff / Fluting (2018) - for use in cut-off EoL scenario cases ts/FEFCO <p-agg>
Outputs
Paper for corrugated board		0.154	kg

## Sheet: LCIA_GWI
	Medical remanufacturing route
	Beitrag		Prozess	Menge	Einheit
	100.00%		Catheter refurbishment	0.866	kg CO2 eq.
		0.345266	DE: Electricity grid mix ts	0.299	kg CO2 eq.
		0.319861	DE: Plastic packaging in waste incineration plant ts <p-agg>	0.277	kg CO2 eq.
		0.146686	EU-28: Corrugated board excl. paper production (2018), open paper input, average composition ts/FEFCO <p-agg>	0.12703	kg CO2 eq.
		0.0656501	US: Citric acid (from starch) ts	0.056853	kg CO2 eq.
		0.0553118	DE: Hydrogen peroxide (100%; H2O2) (Hydrogen from steam reforming) ts	0.0479	kg CO2 eq.
		0.0353349	DE: Polyethylene High Density Granulate (HDPE/PE-HD) ts	0.0306	kg CO2 eq.
		0.00997691	DE: Soda (Na2CO3) ts	0.00864	kg CO2 eq.
		0.00900693	DE: Water (desalinated; deionised) ts	0.0078	kg CO2 eq.
		0.00498845	EU-28: Transport, van (up to 7,5 t total cap., 3.3t payload) (A4) ts	0.00432	kg CO2 eq.
		0.00360277	DE: Ammonia (NH3) synthesis with CO2 recovery, by-product carbon dioxide (without allocation) ts <p-agg>	0.00312	kg CO2 eq.
		0.00243649	DE: Aromatics (BTX) at refinery ts	0.00211	kg CO2 eq.
		0.000749423	DE: Tap water from groundwater ts	0.000649	kg CO2 eq.
		0.000325635	DE: Ethylene oxide (EO) via air ts	0.000282	kg CO2 eq.
		0.000289838	EU-28: Sodium cumene sulphonate (No. 30 - Matrix) ERASM	0.000251	kg CO2 eq.
	Virgin production route
	Beitrag		Prozess	Menge	Einheit
	1		Catheter production	1.745	kg CO2 eq.
		0.570774	DE: Polyetherimide granulate (PEI) ts	0.996	kg CO2 eq.
		0.173066	DE: Plastic packaging in waste incineration plant ts <p-agg>	0.302	kg CO2 eq.
		0.115759	US: Electricity grid mix ts	0.202	kg CO2 eq.
		0.0727966	EU-28: Corrugated board excl. paper production (2018), open paper input, average composition ts/FEFCO <p-agg>	0.12703	kg CO2 eq.
		0.0268195	US: Polyethylene High Density Granulate (HDPE/PE-HD) ts	0.0468	kg CO2 eq.
		0.0196562	US: Polyamide 6 Granulate (PA 6) ts	0.0343	kg CO2 eq.
		0.0131232	GLO: Transoceanic ship, containers, 27,500 dwt payload capacity, ocean going ts	0.0229	kg CO2 eq.
		0.0025043	EU-28: Transport, van (up to 7,5 t total cap., 3.3t payload) (A4) ts	0.00437	kg CO2 eq.
		0.00204585	US: Ammonia (NH3) synthesis with CO2 recovery, by-product carbon dioxide (without allocation) ts <p-agg>	0.00357	kg CO2 eq.
		0.00150143	EU-28: Polyurethane flexible foam (PU) - TDI-based, no flame retardant, low density EUROPUR	0.00262	kg CO2 eq.
		0.00126648	US: Polyethylene Low Density Granulate (LDPE/PE-LD) ts	0.00221	kg CO2 eq.
		0.000462464	DE: Polyethylene glycol (PEG) ts	0.000807	kg CO2 eq.
		0.000209169	US: Ethylene oxide (EO) via air ts	0.000365	kg CO2 eq.
		1.88539e-06	US: Water deionized ts	3.29e-06	kg CO2 eq.

## Sheet: LCIA_resource_use
	Medical remanufacturing route
	Beitrag		Prozess	Menge	Einheit
	100.00%		Catheter refurbishment	1.98e-07	kg Sb eq.
		0.560606	DE: Electricity grid mix ts	1.11e-07	kg Sb eq.
		0.250505	EU-28: Corrugated board excl. paper production (2018), open paper input, average composition ts/FEFCO <p-agg>	4.96e-08	kg Sb eq.
		0.0955151	US: Citric acid (from starch) ts	1.8912e-08	kg Sb eq.
		0.0333838	DE: Hydrogen peroxide (100%; H2O2) (Hydrogen from steam reforming) ts	6.61e-09	kg Sb eq.
		0.0269697	DE: Polyethylene High Density Granulate (HDPE/PE-HD) ts	5.34e-09	kg Sb eq.
		0.0104545	DE: Water (desalinated; deionised) ts	2.07e-09	kg Sb eq.
		0.00969697	DE: Plastic packaging in waste incineration plant ts <p-agg>	1.92e-09	kg Sb eq.
		0.00325758	US: Ammonia (NH3) synthesis with CO2 recovery, by-product carbon dioxide (without allocation) ts <p-agg>	6.45e-10	kg Sb eq.
		0.00243939	Aromatics (BTX) at refinery, production mix, at refinery, from crude oil, 40 MJ/kg net calorific value - DE	4.83e-10	kg Sb eq.
		0.00182828	DE: Soda (Na2CO3) ts	3.62e-10	kg Sb eq.
		0.00178788	Transport, van (up to 7,5 t total cap., 3.3t payload) (A4), consumption mix, diesel driven, Euro 4, cargo - EU-28	3.54e-10	kg Sb eq.
		0.000426263	DE: Tap water from groundwater ts	8.44e-11	kg Sb eq.
		9.29293e-05	EU-28: Sodium cumene sulphonate (No. 30 - Matrix) ERASM	1.84e-11	kg Sb eq.
		0.000255556	DE: Ethylene oxide (EO) via air ts	5.06e-11	kg Sb eq.
	Virgin production route
	Beitrag		Prozess	Menge	Einheit
	1		Catheter production	2.78e-07	kg Sb eq.
		0.485612	DE: Polyetherimide granulate (PEI) ts	1.35e-07	kg Sb eq.
		0.144604	US: Electricity grid mix ts	4.02e-08	kg Sb eq.
		0.178417	EU-28: Corrugated board excl. paper production (2018), open paper input, average composition ts/FEFCO <p-agg>	4.96e-08	kg Sb eq.
		0.109712	US: Polyethylene High Density Granulate (HDPE/PE-HD) ts	3.05e-08	kg Sb eq.
		0.0329496	US: Polyamide 6 Granulate (PA 6) ts	9.16e-09	kg Sb eq.
		0.0227698	EU-28: Polyurethane flexible foam (PU) - TDI-based, no flame retardant, low density EUROPUR	6.33e-09	kg Sb eq.
		0.00791367	US: Ammonia (NH3) synthesis with CO2 recovery, by-product carbon dioxide (without allocation) ts <p-agg>	2.2e-09	kg Sb eq.
		0.00751799	DE: Plastic packaging in waste incineration plant ts <p-agg>	2.09e-09	kg Sb eq.
		0.00543165	GLO: Transoceanic ship, containers, 27,500 dwt payload capacity, ocean going ts	1.51e-09	kg Sb eq.
		0.00172662	US: Polyethylene Low Density Granulate (LDPE/PE-LD) ts	4.8e-10	kg Sb eq.
		0.00147122	DE: Polyethylene glycol (PEG) ts	4.09e-10	kg Sb eq.
		0.00127338	EU-28: Transport, van (up to 7,5 t total cap., 3.3t payload) (A4) ts	3.54e-10	kg Sb eq.
		0.000715827	US: Ethylene oxide (EO) via air ts	1.99e-10	kg Sb eq.
		2.76978e-06	US: Water deionized ts	7.7e-13	kg Sb eq.

## Sheet: Sensitivity_analysis
xcol	GWI	Abiotic resource use	Circularity	GWI	Abiotic resource use
0	1.745	2.7803e-07	1	0	0
0.1	1.69963	2.7384e-07	1.05496	0.0260011	0.0150703
0.2	1.65251	2.6963e-07	1.11632	0.053004	0.0302126
0.3	1.60329	2.6541e-07	1.18526	0.081212	0.0453908
0.4	1.55154	2.6117e-07	1.26326	0.110864	0.0606409
0.5	1.49675	2.569e-07	1.35226	0.142265	0.075999
0.6	1.43821	2.5262e-07	1.45476	0.175813	0.091393
0.7	1.375	2.483e-07	1.57405	0.212034	0.106931
0.8	1.30589	2.4395e-07	1.71463	0.251641	0.122577
0.9	1.22914	2.3954e-07	1.88267	0.295622	0.138438
1	1.14235	2.3508e-07	2.08685	0.345358	0.15448
